# Supplementary material
Source: PubMed Central journal article supplement (PMC6879805)
Supplement: NIHMS1524405-supplement-1.pdf [file NIHMS1524405-supplement-1.pdf]

**Supplementary table. Cox proportional hazards regression analysis for time to pregnancy as a function of male Alternative Healthy Eating Index for Pregnancy (AHEI-P)<sup>8</sup> score (tertile) and selected covariates for ISIS participants (n = 117 couples). Hazard Ratio (HR) with 95% Confidence Intervals (95% CI) for time to pregnancy outcomes<sup>a</sup>**

|                                                                | HR (95% CI)      | P-value |
|----------------------------------------------------------------|------------------|---------|
| <i>Clinical pregnancy (n = 80)</i>                             |                  |         |
| Model 1 <sup>b</sup>                                           |                  |         |
| AHEI-P medium                                                  | 1.18 (0.64-2.19) | 0.60    |
| AHEI-P high                                                    | 1.24 (0.69-2.24) | 0.48    |
| Model 2 <sup>c</sup>                                           |                  |         |
| AHEI-P medium                                                  | 1.28 (0.67-2.44) | 0.45    |
| AHEI-P high                                                    | 1.30 (0.69-2.43) | 0.42    |
| Model 3 <sup>d</sup>                                           |                  |         |
| AHEI-P medium                                                  | 1.44 (0.69-3.03) | 0.34    |
| AHEI-P high                                                    | 1.47 (0.71-3.06) | 0.30    |
| <i>Clinical pregnancy that resulted in live birth (n = 69)</i> |                  |         |
| Model 1 <sup>b</sup>                                           |                  |         |
| AHEI-P medium                                                  | 1.29 (0.66-2.49) | 0.46    |
| AHEI-P high                                                    | 1.20 (0.62-2.29) | 0.59    |
| Model 2 <sup>c</sup>                                           |                  |         |
| AHEI-P medium                                                  | 1.39 (0.70-2.78) | 0.35    |
| AHEI-P high                                                    | 1.25 (0.63-2.49) | 0.53    |

Model 3<sup>d</sup>

|               |                  |      |
|---------------|------------------|------|
| AHEI-P medium | 1.41 (0.65-3.08) | 0.39 |
| AHEI-P high   | 1.29 (0.59-2.81) | 0.52 |

*Pregnancy loss (n = 11)*Model 1<sup>b</sup>

|               |                  |      |
|---------------|------------------|------|
| AHEI-P medium | 1.04 (0.16-6.76) | 0.96 |
| AHEI-P high   | 0.65 (0.14-3.09) | 0.59 |

Model 2<sup>c</sup>

|               |                  |      |
|---------------|------------------|------|
| AHEI-P medium | 1.02 (0.16-6.74) | 0.98 |
| AHEI-P high   | 0.54 (0.10-2.97) | 0.48 |

Model 3<sup>d</sup>

|               |                       |      |
|---------------|-----------------------|------|
| AHEI-P medium | 2.75 (0.26-<br>28.95) | 0.40 |
| AHEI-P high   | 1.22 (0.12-<br>12.18) | 0.86 |

<sup>a</sup> The sample size does not include the n = 15 who were censored at baseline visit. All covariates are for the female unless otherwise indicated. The reference group is the lowest tertile of AHEI-P. *P*-values determined by Cox proportional hazards regression.

<sup>b</sup> Adjusted for age and energy intake

<sup>c</sup> Adjusted for age, energy intake, and BMI

<sup>d</sup> Adjusted for age, energy intake, BMI, male education, and male smoking status
